# Supplementary material for: Far-red and sensitive sensor for monitoring real time H2O2 dynamics with subcellular resolution and in multi-parametric imaging applications
Source: PubMed Central journal article supplement (PMC11065073; doi:10.21203/rs.3.rs-3974015/v1), 2024-04-17
Supplement: NIHPPrs3974015v1-supplement-1.pdf [file NIHPPrs3974015v1-supplement-1.pdf]

## Supplementary Files

This is a list of supplementary files associated with this preprint. Click to download.

- [NCBoROSHTmanuscripts supplementary figures.pdf](#)
